# Supplementary material for: Additive effects of inhibiting both mTOR and glutamine metabolism on the arthritis in SKG mice
Source: Sci Rep. 2019 Apr 23;9:6374. doi: 10.1038/s41598-019-42932-1 (PMC6476881; doi:10.1038/s41598-019-42932-1)

**Additive effects of inhibiting both mTOR and glutamine metabolism on the arthritis in SKG mice**

Yo Ueda,<sup>1</sup> M.D., Jun Saegusa,<sup>1</sup> M.D., Ph.D., Takaichi Okano,<sup>1</sup> MD, Ph.D., Sho Sendo,<sup>1</sup> M.D., Ph.D., Hirotaka Yamada,<sup>1</sup> M.D., Keisuke Nishimura,<sup>1</sup> MD, Ph.D., and Akio Morinobu,<sup>1</sup> MD, Ph.D.

<sup>1</sup>Rheumatology and Clinical Immunology, Kobe University Graduate School of Medicine, Kobe, Japan.

Corresponding author: Akio Morinobu

7-5-1 Kusunoki-Cho, Chuo-Ku, Kobe 650-0017, Japan

Phone +81-78-382-6197, Fax +81-78-382-6209

Email: morinobu@med.kobe-u.ac.jp

Conflicts of interest: none

**Suppl Table 1.** Primers used in this study

| <b>Gene</b>             |                | <b>Primer sequences (5'-3')</b> |
|-------------------------|----------------|---------------------------------|
| <b>β2-microglobulin</b> | Forward primer | TTCTGGTGCTTGTCTCACTGA           |
|                         | Reverse primer | CAGTATGTTTCGGCTTCCCATTTC        |
| <b>TGFβ</b>             | Forward primer | GCTAATGGTGGACCGCAACAAC          |
|                         | Reverse primer | GCACTGCTTCCCGAATGTCTG           |
| <b>PD-L1</b>            | Forward primer | TGCTTCTCAATGTGACC               |
|                         | Reverse primer | GGAACAACAGGATGGAT               |
| <b>Arg-1</b>            | Forward primer | CCAGAAGAATGGAAGAGTCAGTGT        |
|                         | Reverse primer | GCAGATATGCAGGGAGTCACC           |
| <b>iNOS</b>             | Forward primer | CACCAAGCTGAACTTGAGCG            |
|                         | Reverse primer | CGTGGCTTTGGGCTCCTC              |
| <b>NOX2</b>             | Forward primer | TGTGGTTGGGGCTGAATGTC            |
|                         | Reverse primer | CTGAGAAAGGAGAGCAGATTTTCG        |

**Suppl Figure 1.** CFSE-labeled CD4<sup>+</sup> T cells isolated from untreated Balb/c mice were cultured with several concentrations of compound 968 (C968; an inhibitor of glutaminase 1) and DON as a single drug (A) and in combination with 1  $\mu$ M of rapamycin (B). After 3 days of culture, the collected cells were assessed the CFSE fluorescence using flow cytometry.

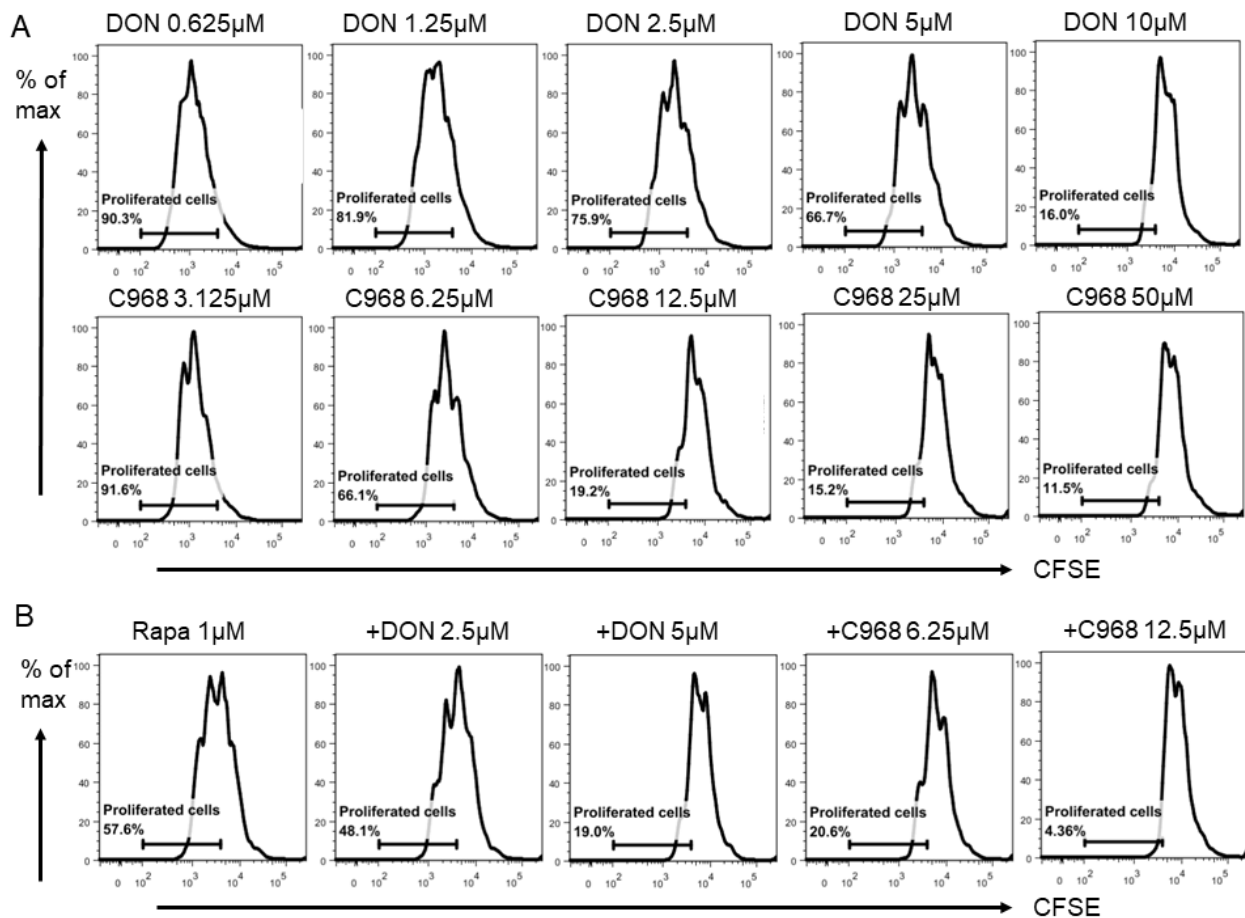

**Suppl Figure 2.** Viability of CD4<sup>+</sup> T cells cultured with DMSO, rapamycin, DON, or rapamycin and DON were assessed by 7-AAD staining. CD4<sup>+</sup> T cells isolated from untreated Balb/c mice were cultured as described in Figure 1A, B. After 3 days of culture, the collected cells were stained with 7-AAD, and the frequency of dead cells was determined by measuring the 7-AAD fluorescence using flow cytometry.

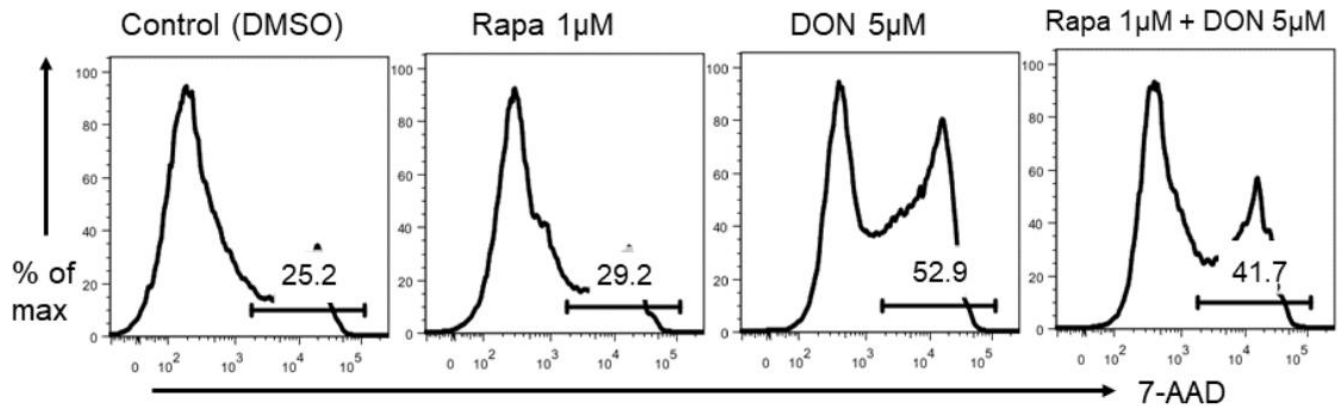

**Suppl Figure 3.** CD4<sup>+</sup> T cells were cultured for 24hr in 96-well flat-bottomed plates precoated with 10 µg/ml anti-CD3 mAb and 5 µg/ml anti-CD28 mAb. DMSO, 0.1µM Torin1 (an ATP-competing dual mTORC1 and mTORC2 inhibitor), 1µM rapamycin (Rapa), 5µM DON (DON), or the combination of 1µM rapamycin and 5µM DON (Rapa+DON) were administered. Cell lysates were analyzed by Western blotting with anti-phospho-S6 kinase (Thr389), anti-S6 kinase (S6K), anti-phospho-Akt (Ser473), anti-Akt, and anti-β-actin antibodies. The bound antibodies were visualized using a chemiluminescence reagent following the manufacturer's instructions.

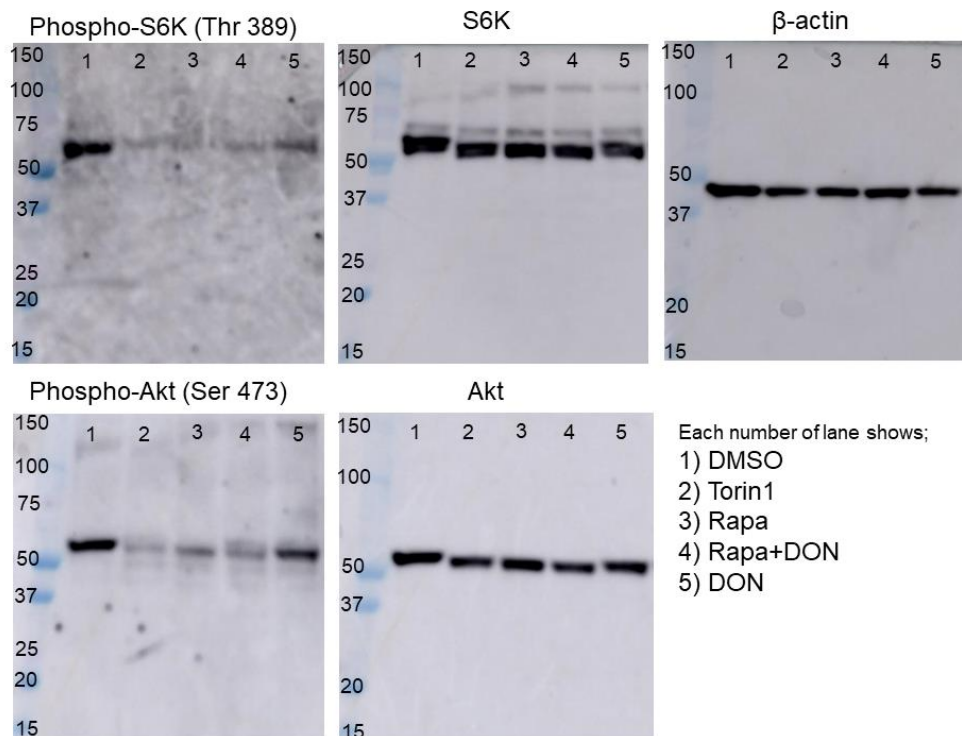

**Suppl Figure 4.** CFSE-labeled CD4<sup>+</sup> T cells isolated from untreated Balb/c mice were cultured with several concentrations of rapamycin in combination with 5 $\mu$ M DON. DMSO was the positive control without DON nor rapamycin. (A) After 3 days of culture, the collected cells were assessed the CFSE fluorescence using flow cytometry. Data are representative of 4 independent experiments. One-way ANOVA with Dunnett's multiple comparison test compared to DON was performed. Bars show mean  $\pm$  SEM. \*\*P < .01; \*\*\*P < .001. (B)

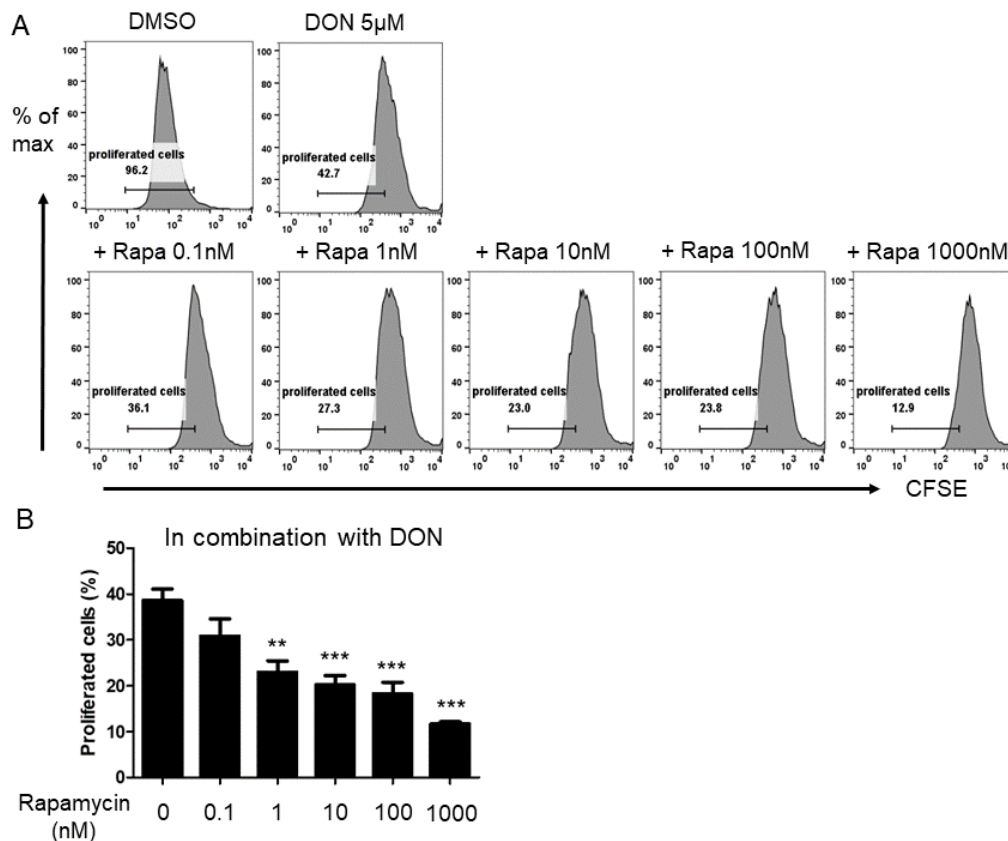

**Suppl Figure 5.** *In vitro*–generated G-MDSCs cultured with DMSO, rapamycin, DON, or rapamycin and DON were isolated by manual MACS against Ly6G+. The collected cells were stained with anti-CD11b and anti-Ly6G antibodies. The purity of the *in vitro*–generated G-MDSCs was analyzed by flow cytometry.

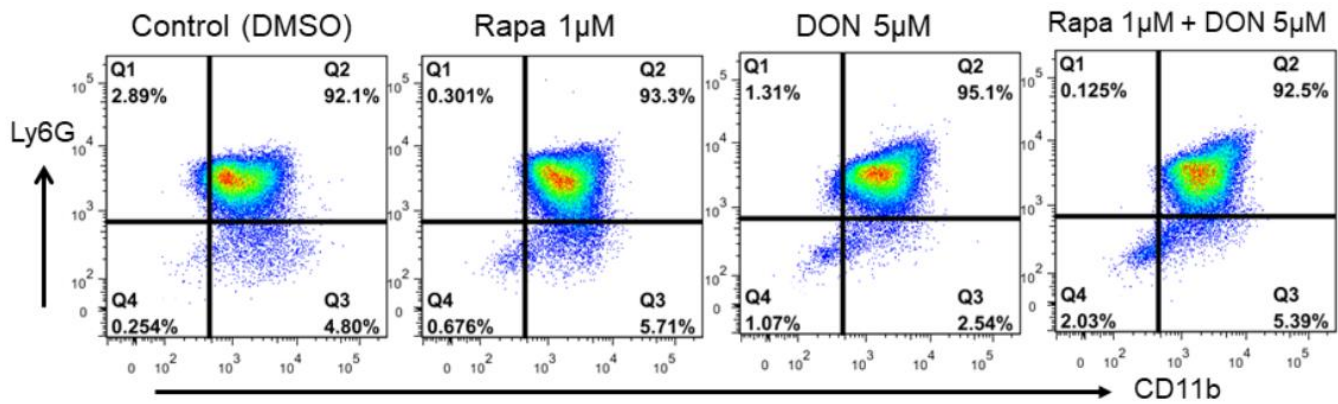

**Suppl Figure 6.** Body weight of mice treated with vehicle (n=6); rapamycin (Rapa, n=7), DON (n=5), or rapamycin plus DON (Rapa+DON; n=7), recorded up to day 62 after ZyA injection.

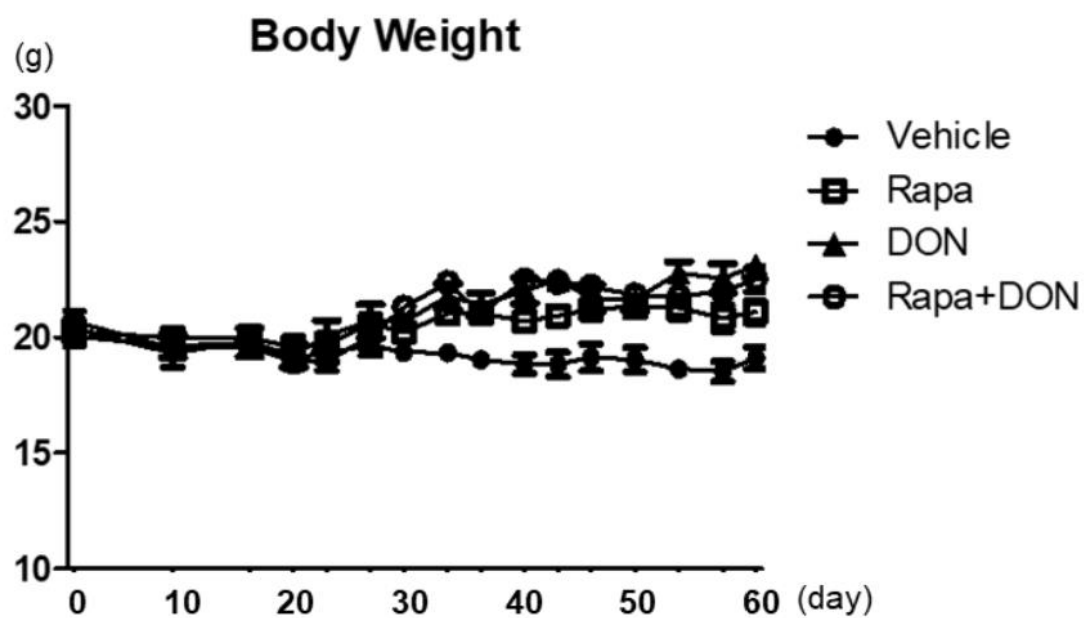

**Suppl Figure 7.** Immunohistochemistry in the paws of SKG mice treated with each drug regimen to measure the presence of synoviocytes (stained with cadherin-11; A), myeloid cells (stained with CD11b; B), and T lymphocyte (stained with CD3; C) was performed. Pictures are representatives of each group; original magnification 40× and the selected area was one of three areas assessed in magnification 400× (surrounded by yellow line). The extents of the presence of these cell populations by using semi-quantitative assessment (SQA). Bars show mean  $\pm$  SEM. (D)

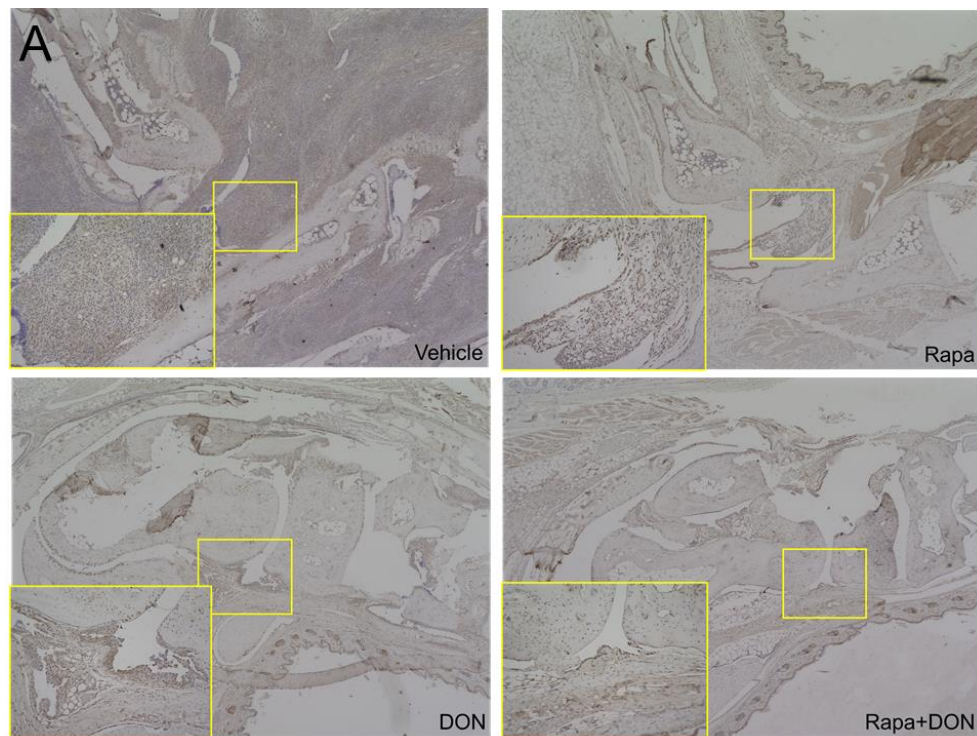

Combined inhibition of mTOR and glutamine metabolism on arthritis

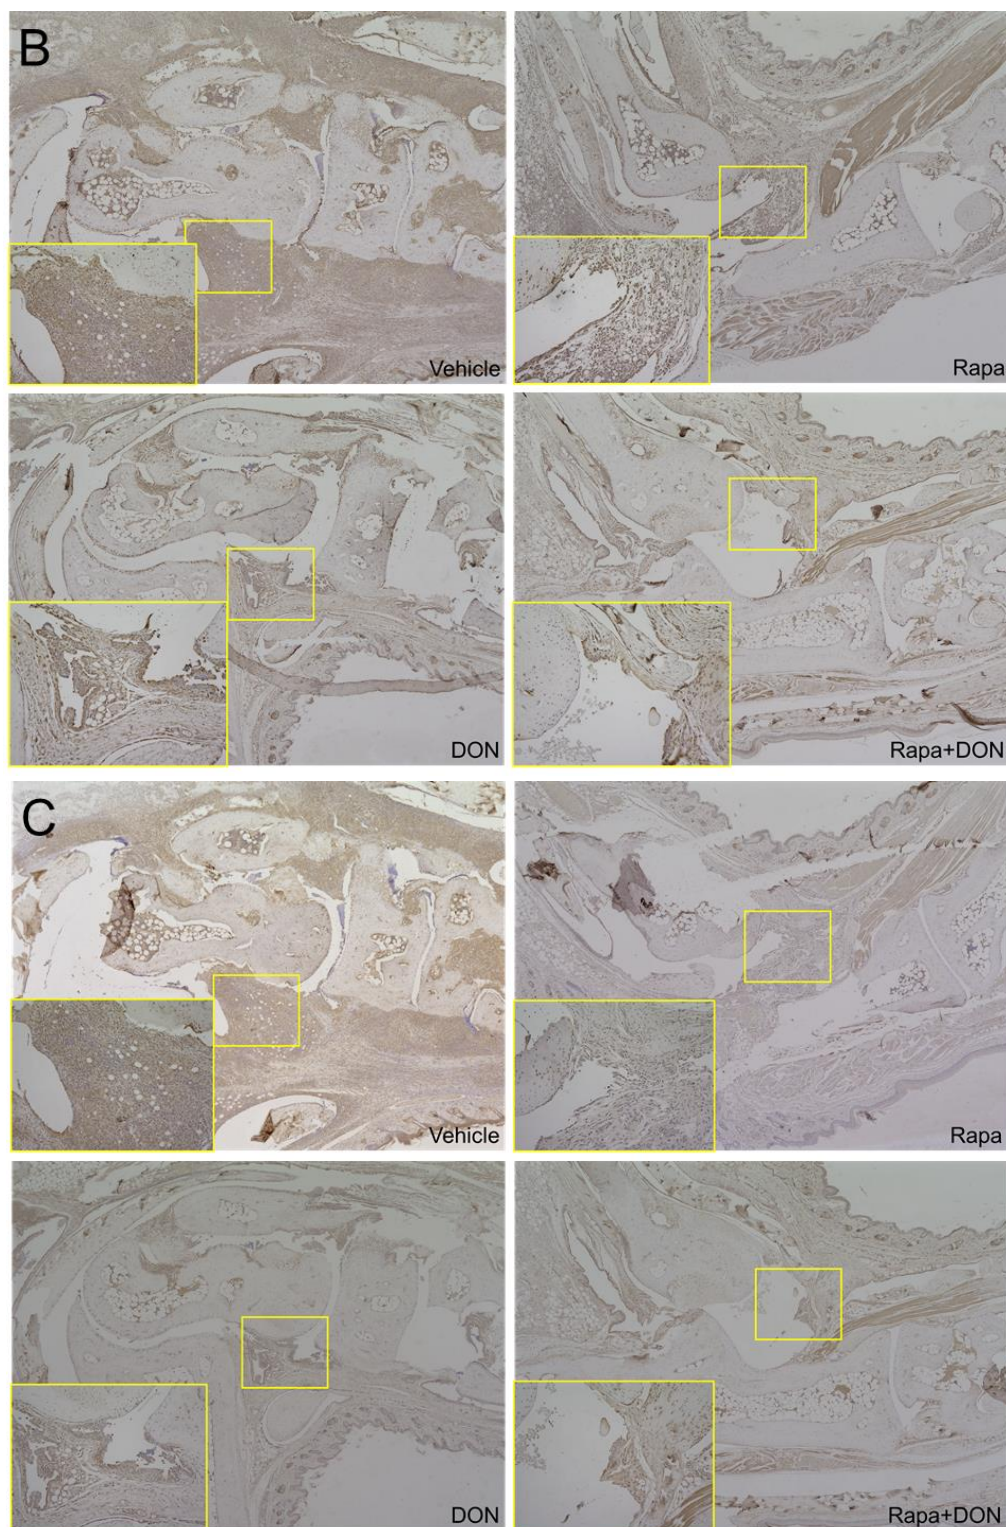

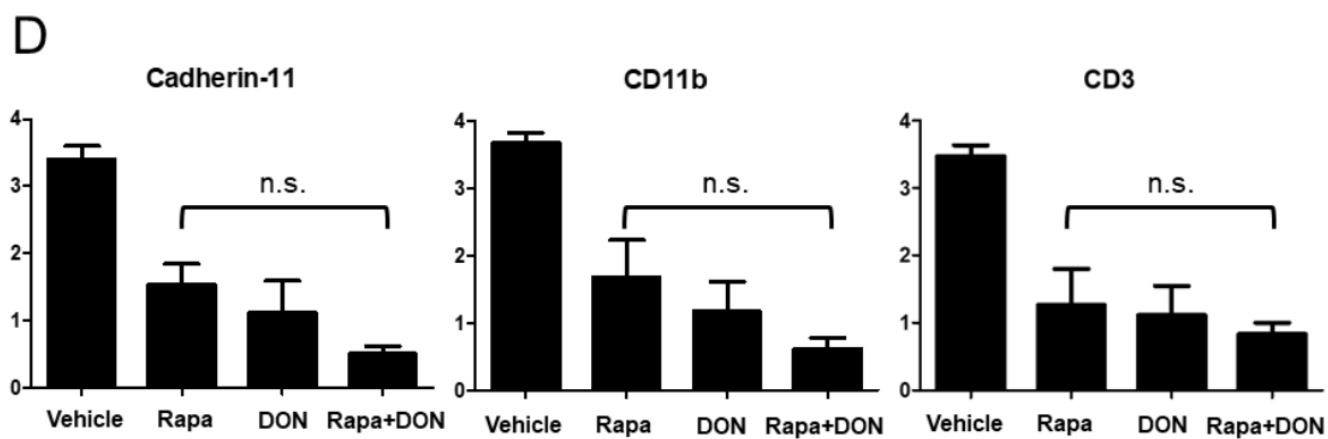

Supplement: Supplementary file 1 — Supplementary figures and table [file 41598_2019_42932_MOESM1_ESM.pdf]
